# Supplementary material
Source: PubMed Central journal article supplement (PMC3323014)
Supplement: supp_M111.335661_jbc.M111.335661-1.pdf [file supp_M111.335661_jbc.M111.335661-1.pdf]

**Supplemental Table 1. Primer list (5' to 3')**

KF19 GGCCGAAGCGACCACCTGCAACATGGAG  
KF20 CTTCTATTGGAGTCCGCAGGCTCATTCC  
KF17 CTCACTGGCCTAATACGACTCACTATAGGG  
KF24 TCCATGTTGCAGGTGGTCGCTTCGGCCATC  
KF73 GGGGGTACCTTCCTGACTCCAAAAATGGCAATCGGAC  
KF71 CCCGGATCCATTGGCCAACTTGGCTACAAAGTTC  
KF92 GGTACCGGCCAGTTAGGCCAGAGAAATGTTT  
KF50 TCACAGGGACAGTCCTGCT  
KF105 CTGTATGGCACCAGACTGGGGTGAG  
KF57 GCTAGTGGTGAGTCAGATG  
KF110 CACAATAACAATAGAAAAGAGTCTTGTG  
KF111 ACAAAGACACCATTTTATTACGCGATG  
KF112 AGGGGCGGGTTTGTTCGCGAAAG  
KF109 GCGTGTCTATATAAAAGGCTACGGG  
KF108 GGCTACGGGCCGCGGCATGTCG  
KF101 CAGTTCCTCGTACAAAGTCAG  
KF113 ATTTAAAGGCATTCAAAGTGGCCCAG  
KF115 GGATTGAGCCAACGAGGTTTCG  
KF116 TCCCATCCTTGCACACCGATTGGCT  
KF106 CATGTCTTTCTGAAAACAGAGGCTTGGTAG  
KF107 CCGGCATTAAGAGAAAAGGGTAAAACGTG  
KF30 TAGGTGAGGCTGCGCACGTGGGTCCCAC  
KF26 GGCCTGGCTTTGTGCTACCGGCATGTGG  
KF169 GCCTGTTCCCGCAGCGATGCCCCGCCACATG  
KF170 GGCCGCTGATTCTTCAGAACAGACGCGCCAC  
KF330 CGTAACTCAATGTTTCACAACAGACA  
KF331 CTCCGGCCTTTGCTGCAA  
KF198 GGGAAAGCTTGGGCAGGAAAGATGCCTCTTAAC  
KF199 CCCGGATCCGAGTTTGTGAATTAGACAGAGTTC
